# Supplementary material
Source: publisher site journal article supplement (https://www.dovepress.com/get_supplementary_file.php?f=498828.docx)
Supplement: Supplementary file 1 [file get_supplementary_file.php]

**Supplementary Tables S1. Variable assignments of all 68 predictors**

| Factors | The prescribed value |
| --- | --- |
| Age | 1=18-45 years, 2=45-65 years, 3=65-75 years |
| Sex | 1=male, 2=female |
| N-Acetyltransferase 2 type | 1=FA, 2=IA, 3=SA |
| Weight | 0=≤50kg, 1=＞50kg |
| Smoking | 0=no, 1=yes |
| Drinking | 0=no, 1=yes |
| Comorbidities | 0=no, 1=yes |
| Fever a | 0=no, 1=yes |
| Headache a | 0=no, 1=yes |
| Nausea a | 0=no, 1=yes |
| Vomit a | 0=no, 1=yes |
| Cough a, b | 0=no, 1=yes |
| Weight Loss a, b | 0=no, 1=yes |
| Night sweats a, b | 0=no, 1=yes |
| Focal neurologic signs a | 0=no, 1=yes |
| Cranial nerve symptoms b | 0=no, 1=yes |
| Disability A | 0=no, 1=yes |
| Consciousness disorders a | 0=no, 1=drowsiness, 2=blurred consciousness, 3=lethargy, 4=coma, 5=delirium |
| Meningeal irritation signs a | 0=no, 1=yes |
| MRC grade a | 1=grade I, 2= grade II, 3= grade III |
| Glasgow scale a | 0=15 score, 1=12-14 score, 2=9-11 score, 3=3-8 score, 4=＜3 score |
| Leukocytes | 0=4-10×109/L, 1=＜4×109/L, 2=＞10×109/L |
| Haemoglobin a | 0=120-160 g/L(male) 110-150 g/L (female),  1=90-120 g/L (male) 90-110 g/L (female),  2=60-90 g/L |
| Blood glucose. | 0=＜3.9 mmol/L, 1=3.9-6.1 mmol/L, 2=＞6.1 mmol/L |
| CD4 T-cell counts | 0=414-1440/uL, 1=200-414/uL, 2=＜200uL |
| CD8 T-cell counts. | 0= normal, 1=decline |
| CD3 T-cell counts. | 0= normal, 1= decline |
| CSF examination |  |
| Intracranial pressure | 0=80-180 cmH2O, 1=180-300 cmH2O, 2=≥300 cmH2O |
| CSF leukocyte count | 0=＜500×106/L, 1=＞500×106/L |
| CSF lymphocyte percentage a | 0=＜50%, 1=≥50% |
| CSF protein a | 0=200-400 mg/L, 1=＞400 mg/L |
| ADA a | 0=0-8 u/L, 1=＞8 u/L |
| CSF/plasma glucose ratio | 0=no, 1=yes |
| CSF glucose a | 0=2.5-4.4 mmol/L, 1=＜2.5 mmol/L, 2=＞4.4 mmol/L |
| Chlorine a | 0=120-130 mmol/L, 1=＜120mmol/L |
| *M.tb* in CSF | 0=negative, 1=only AFB positive, 2=only culture positive, 3=nucleic acid testing positive |
| *M.tb* in pulmonary | 0=negative, 1=positive |
| Brain imaging b |  |
| Normal | 0=no, 1=yes |
| Hydrocephalus | 0=no, 1=yes |
| High density in basal cistern | 0=no, 1=yes |
| Meningeal enhancement | 0=no, 1=yes |
| Tuberculoma | 0=no, 1=yes |
| Cerebral infarction | 0=no, 1=yes |
| Chest CT b | 0=normal, 1=disseminated tuberculosis, 2=active tuberculosis, 3=others |
| Tuberculosis other than brain and pulmonary | 0=no, 1=yes |
| Isoniazid dose | 0=300mg/day, 1= 600mg/day |
| Dead of disease c | 0=no, 1=yes |

a. The same criteria were used to assess at visit 0, and after 3 months; b. these items were merged in 3 month. c.the number of deaths at the end of 3 months and 12 months; *M.tb*: Mycobacterium tuberculosis
